# Supplementary material for: Multiparametric Phenotyping of Circulating Tumor Cells for Analysis of Therapeutic Targets, Oncogenic Signaling Pathways and DNA Repair Markers
Source: MDPI journal article supplement (doi:10.3390/cancers14112810), 2022-06-06
Supplement: s1 [file s1]

| Cell line                                                      | Culture media                                                                                                                                                                                                                                                                                                                                                      |
|----------------------------------------------------------------|--------------------------------------------------------------------------------------------------------------------------------------------------------------------------------------------------------------------------------------------------------------------------------------------------------------------------------------------------------------------|
| <b>FaDu</b><br><b>UD-SCC-4</b><br><b>UM-SCC-22B</b><br>(HNSCC) | <b>MEM Medium</b><br><i>(Life Technologies, cat. no.: 31095052)</i><br><b>12% FCS</b><br><i>(Life Technologies, cat. no.: 10270-106)</i><br><b>1x non-essential amino acids</b><br><i>(Life Technologies, order: 11140035)</i>                                                                                                                                     |
| <b>SCC-25</b><br>(HSNCC)                                       | <b>DMEM/F12 +GlutaMax</b><br><i>(ThermoFisher, cat. no.: 31331093)</i><br><b>10% FCS</b><br><i>(Life Technologies, order: 10270-106)</i><br><b>2mM L-Glutamine</b><br><i>(ThermoFisher, cat. no.: 25030149)</i><br><b>1% Penicillin/ Streptomycin</b><br><i>(Fisher BioReagent, cat. no.: BP2959-50)</i><br><b>15mM HEPES</b><br><i>(sigma, order: H4034-100g)</i> |
| <b>MDA-MB-231</b><br>(TN breast cancer)                        | <b>Advanced DMEM/F12</b><br><i>(ThermoFisher, cat. no.: 12634010)</i><br><b>10% FCS</b><br><i>(Life Technologies, cat. no.: 10270-106)</i><br><b>2mM L-Glutamine</b><br><i>(ThermoFisher, cat. no.: 25030149)</i>                                                                                                                                                  |
| <b>SW620</b><br>(colon cancer)                                 | <b>RPMI Medium 1640</b><br><i>(Life Technologies cat. no.: 21875-034)</i><br><b>20% FCS</b><br><i>(Life Technologies, cat. no.: 10270-106)</i><br><b>2mM L-Glutamine</b><br><i>(ThermoFisher, cat. no.: 25030149)</i><br><b>1% Penicillin/ Streptomycin</b><br><i>(Fisher BioReagent, cat. no.: BP2959-50)</i>                                                     |

**Supplementary Table S1: Media composition.**

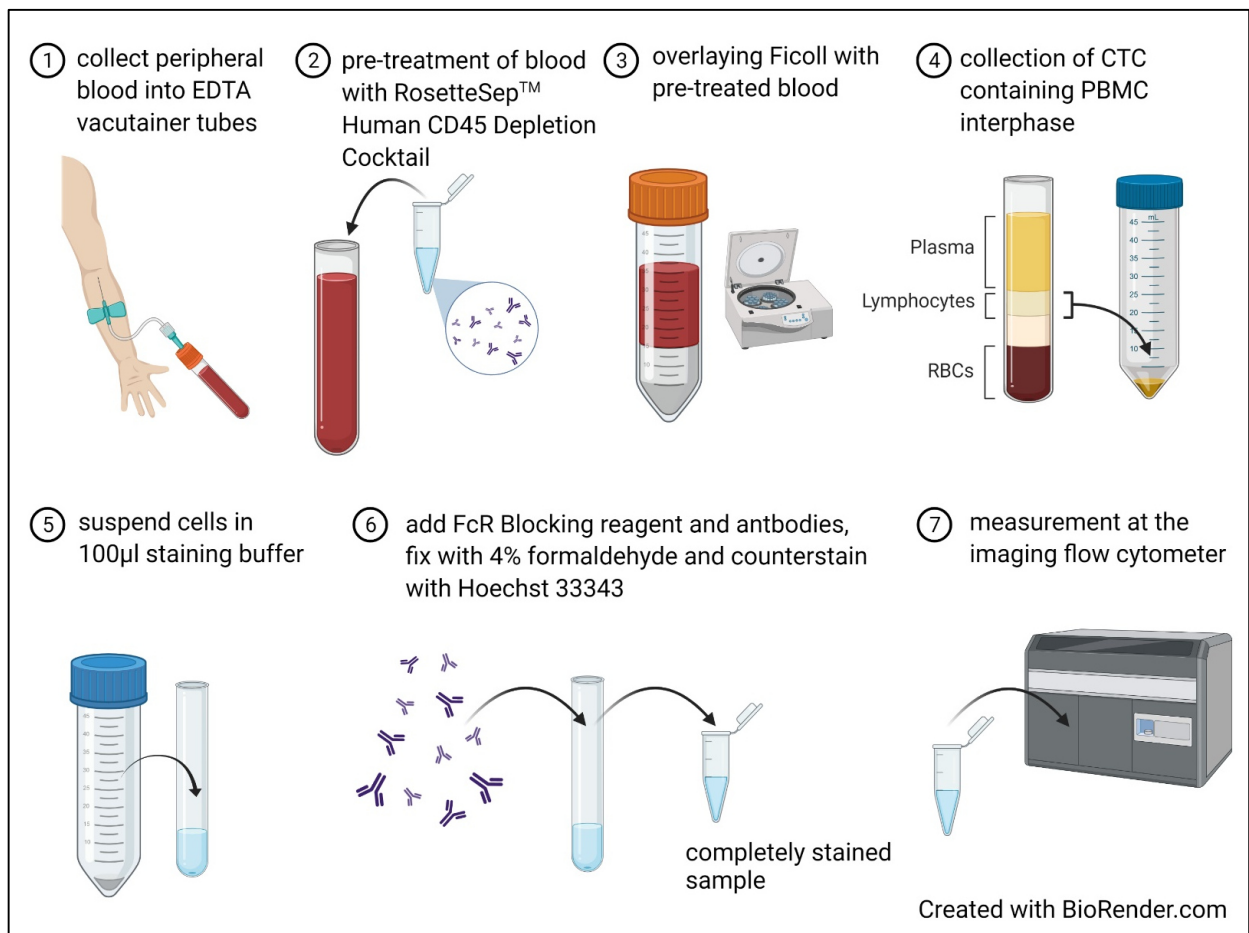

**Supplementary Figure S1: Workflow of the CTC analysis.** (1) Blood samples were processed within four hours after collection. (2) Enrichment of CTCs by adding RosetteSep™ Human CD45 Depletion Cocktail was done, (3) followed by Ficoll density centrifugation and (4) harvest of the PBMC interphase containing CTCs. (5-6) Next, cells were stained for extracellular markers, fixed with 4% formaldehyde and counterstained with Hoechst 33342 and (7) acquired at the Amnis® brand ImageStream®X MkII. ***Created with BioRender.com***

| Laser (nm)   | Target               | Fluorophore | Channel | Laser power (mW) |
|--------------|----------------------|-------------|---------|------------------|
| 405          | Hoechst 33342        | UV          | 7       | 30               |
| 488          | EpCAM-EGFR           | AF488       | 2       | 100              |
| 561          | PD-L1                | PE          | 3       | 200              |
| 561          | phospho-EGFR         | TexasRed    | 4       | 200              |
| 561          | PD-L2                | PE-Vio770   | 6       | 200              |
| 642          | CD45 / $\gamma$ H2AX | AF647       | 11      | 150/130          |
| 642          | CD45                 | APC/Fire    | 12      | 130              |
| 782          | SCC                  |             | 12      | 0.9              |
| bright field |                      |             | 1 and 9 |                  |

**Supplementary Table S2: Laser settings.** For data acquisition the 40x magnification was used and the fluidics were set to low speed and high sensitivity, EDF-module was switched off and focus/ centering were set to automatic. CD45 signal was acquired in channel 12 (instead of 11) for samples stained for  $\gamma$ H2AX.

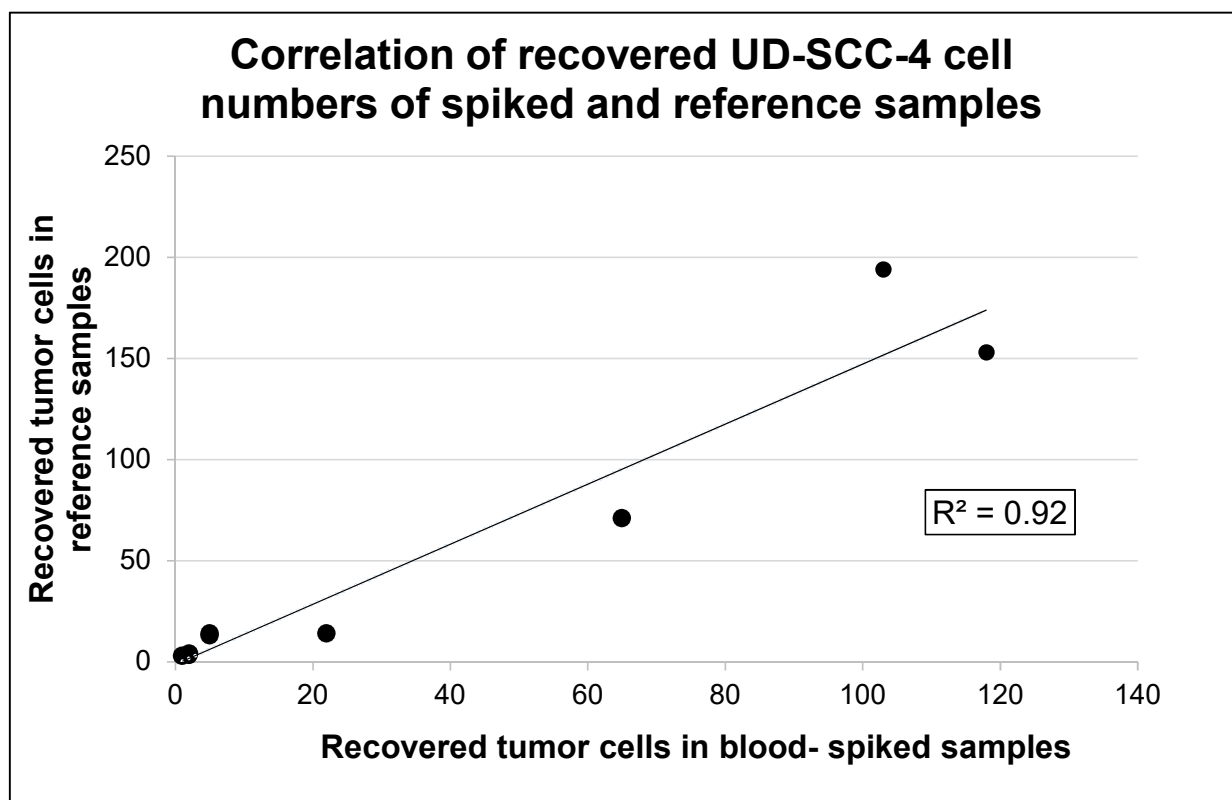

**Supplementary Figure S2: Results from spiking experiments using the UD-SCC-4 cell line.**

Analysis of samples (n=3 replicates per dilution) revealed a correlation of  $R^2 = 0.92$  of recovered cells in reference and spiked samples. The median recovery rate was 50%.

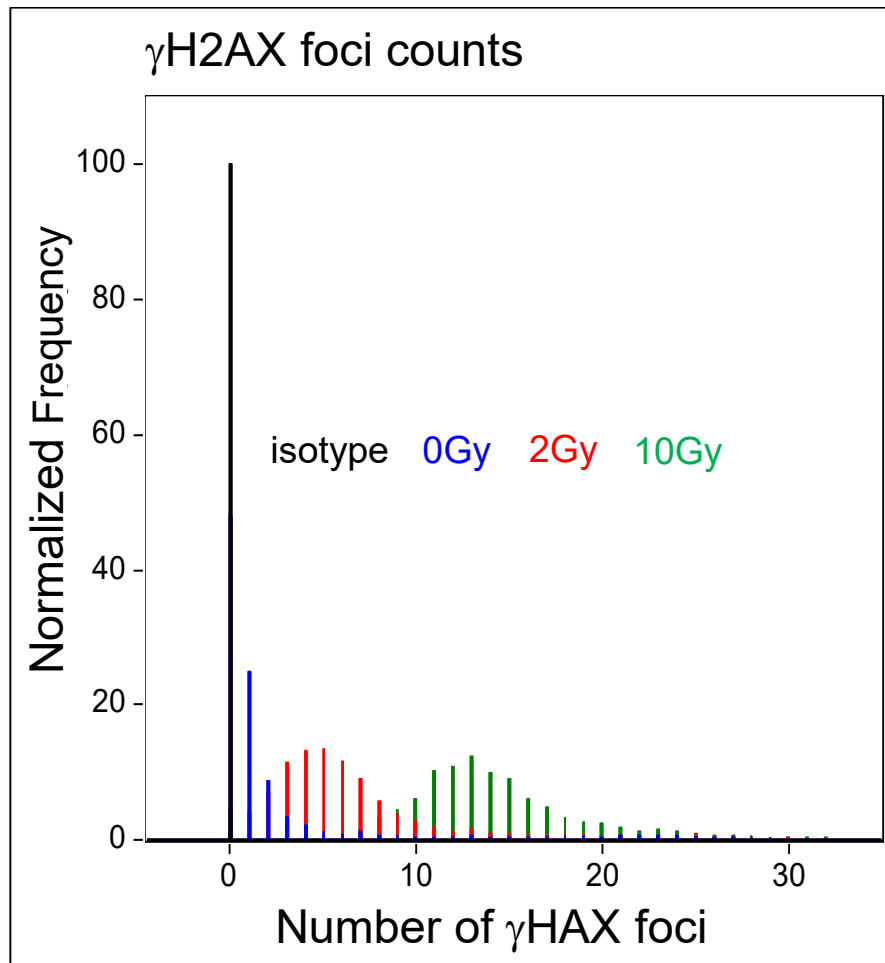

**Supplementary Figure S3: Quantitative analysis of  $\gamma$ H2AX foci.** The distribution of the number of  $\gamma$ H2AX foci detected in FaDu cells irradiated with the indicated dose is presented in the histogram.
